# Supplementary material
Source: Research Square preprint supplement (doi:10.21203/rs.3.rs-9005425/v1)
Supplement: Supplementary file 1 [file e8774da2cae038d431d9e0aa.docx]

**Supplemental material**

**Title**: **Development and interpretability analysis of a risk prediction model for Problematic Internet Use in adolescents**

**Supplemental captions:**

**Supplemental Table 1.** Variance inflation factor analysis for multicollinearity assessment.

**Supplemental Table 2.** Evaluation of the 5-fold cross-validation model performance.

**Supplemental Table 3.** Evaluation of the machine learning model performance in male.

**Supplemental Table 4.** Evaluation of the machine learning model performance in female.

**Supplemental Table 5**. Results of regression analysis of interaction terms between psychological resilience and self-esteem.

**Supplemental Figure 1.** SHAP feature dependence diagram.

**Supplemental Table 1.** Variance inflation factor analysis for multicollinearity assessment

| **Variables** | ***B*** | ***SE*** | ***Beta*** | ***t*** | ***P*** | **Tolerance** | ***VIF*** |
| --- | --- | --- | --- | --- | --- | --- | --- |
| Grade | 0.011 | 0.005 | 0.022 | 2.201 | 0.028 | 0.972 | 1.029 |
| Residence | -0.014 | 0.009 | -0.016 | -1.472 | 0.141 | 0.882 | 1.134 |
| Maternal educational levels | -0.007 | 0.005 | -0.017 | -1.530 | 0.126 | 0.861 | 1.162 |
| family economic status | 0.031 | 0.009 | 0.037 | 3.578 | <0.001 | 0.931 | 1.074 |
| Academic performance | -0.001 | 0.006 | -0.002 | -0.198 | 0.843 | 0.881 | 1.135 |
| Sleep quality | -0.039 | 0.009 | -0.048 | -4.486 | <0.001 | 0.868 | 1.153 |
| Negative life events | 0.008 | 0.000 | 0.279 | 24.004 | <0.001 | 0.744 | 1.344 |
| Psychological resilience | -0.001 | 0.001 | -0.025 | -1.977 | 0.048 | 0.619 | 1.615 |
| School connectedness | -0.005 | 0.001 | -0.089 | -7.027 | <0.001 | 0.631 | 1.586 |
| Parent-adolescent cohesion | -0.003 | 0.001 | -0.058 | -5.075 | <0.001 | 0.760 | 1.316 |
| Self-esteem | -0.005 | 0.001 | -0.069 | -5.127 | <0.001 | 0.562 | 1.778 |

**Supplemental Table 2.** Evaluation of the 5-fold cross-validation model performance.

| **Fold** | **Category** | **Algorithm** | **AUC (95%CI)** | **Accuracy** | **Precision** | **Recall** | **F1** | **Brier_Score** |
| --- | --- | --- | --- | --- | --- | --- | --- | --- |
| 1 | Train | LR | 0.783 (0.752, 0.814) | 0.821 | 0.837 | 0.966 | 0.897 | 0.129 |
|  |  | RF | 0.782 (0.751, 0.814) | 0.820 | 0.839 | 0.961 | 0.896 | 0.128 |
|  |  | XGBoost | 0.791 (0.761, 0.822) | 0.823 | 0.835 | 0.973 | 0.898 | 0.147 |
|  |  | LightGBM | 0.784 (0.753, 0.815) | 0.819 | 0.840 | 0.957 | 0.895 | 0.129 |
|  |  | MLP | 0.741 (0.725, 0.757) | 0.828 | 0.855 | 0.948 | 0.899 | 0.172 |
|  | Test | LR | 0.775 (0.746, 0.804) | 0.821 | 0.833 | 0.973 | 0.897 | 0.129 |
|  |  | RF | 0.777 (0.749, 0.804) | 0.815 | 0.835 | 0.960 | 0.893 | 0.131 |
|  |  | XGBoost | 0.786 (0.759, 0.813) | 0.824 | 0.833 | 0.978 | 0.900 | 0.148 |
|  |  | LightGBM | 0.775 (0.746, 0.803) | 0.821 | 0.838 | 0.965 | 0.897 | 0.130 |
|  |  | MLP | 0.736 (0.706, 0.767) | 0.818 | 0.850 | 0.941 | 0.893 | 0.182 |
| 2 | Train | LR | 0.786 (0.754, 0.817) | 0.829 | 0.845 | 0.964 | 0.901 | 0.126 |
|  |  | RF | 0.783 (0.751, 0.814) | 0.822 | 0.844 | 0.955 | 0.896 | 0.129 |
|  |  | XGBoost | 0.793 (0.762, 0.823) | 0.820 | 0.837 | 0.965 | 0.897 | 0.149 |
|  |  | LightGBM | 0.781 (0.750, 0.812) | 0.821 | 0.845 | 0.953 | 0.896 | 0.129 |
|  |  | MLP | 0.743 (0.728, 0.758) | 0.828 | 0.854 | 0.948 | 0.899 | 0.172 |
|  | Test | LR | 0.774 (0.746, 0.803) | 0.821 | 0.834 | 0.973 | 0.898 | 0.129 |
|  |  | RF | 0.793 (0.766, 0.819) | 0.817 | 0.838 | 0.959 | 0.894 | 0.127 |
|  |  | XGBoost | 0.790 (0.763, 0.817) | 0.824 | 0.833 | 0.978 | 0.900 | 0.148 |
|  |  | LightGBM | 0.785 (0.757, 0.812) | 0.824 | 0.840 | 0.966 | 0.899 | 0.128 |
|  |  | MLP | 0.728 (0.695, 0.760) | 0.821 | 0.852 | 0.941 | 0.894 | 0.179 |
| 3 | Train | LR | 0.790 (0.761, 0.819) | 0.822 | 0.840 | 0.963 | 0.897 | 0.128 |
|  |  | RF | 0.778 (0.748, 0.808) | 0.811 | 0.834 | 0.955 | 0.891 | 0.131 |
|  |  | XGBoost | 0.795 (0.766, 0.824) | 0.821 | 0.836 | 0.969 | 0.897 | 0.148 |
|  |  | LightGBM | 0.781 (0.751, 0.811) | 0.817 | 0.839 | 0.955 | 0.894 | 0.131 |
|  |  | MLP | 0.732 (0.717, 0.748) | 0.823 | 0.853 | 0.943 | 0.896 | 0.177 |
|  | Test | LR | 0.775 (0.747, 0.804) | 0.823 | 0.834 | 0.974 | 0.899 | 0.129 |
|  |  | RF | 0.779 (0.752, 0.806) | 0.815 | 0.838 | 0.955 | 0.893 | 0.130 |
|  |  | XGBoost | 0.789 (0.762, 0.815) | 0.822 | 0.835 | 0.971 | 0.898 | 0.148 |
|  |  | LightGBM | 0.775 (0.747, 0.803) | 0.823 | 0.844 | 0.958 | 0.897 | 0.130 |
|  |  | MLP | 0.769 (0.740, 0.798) | 0.839 | 0.858 | 0.960 | 0.906 | 0.161 |
| 4 | Train | LR | 0.794 (0.765, 0.822) | 0.820 | 0.843 | 0.955 | 0.896 | 0.129 |
|  |  | RF | 0.780 (0.750, 0.810) | 0.807 | 0.843 | 0.935 | 0.886 | 0.133 |
|  |  | XGBoost | 0.794 (0.765, 0.823) | 0.819 | 0.840 | 0.957 | 0.895 | 0.150 |
|  |  | LightGBM | 0.788 (0.759, 0.818) | 0.813 | 0.845 | 0.940 | 0.890 | 0.131 |
|  |  | MLP | 0.739 (0.724, 0.755) | 0.825 | 0.853 | 0.946 | 0.897 | 0.175 |
|  | Test | LR | 0.775 (0.746, 0.803) | 0.823 | 0.836 | 0.970 | 0.898 | 0.129 |
|  |  | RF | 0.781 (0.754, 0.808) | 0.815 | 0.840 | 0.951 | 0.892 | 0.130 |
|  |  | XGBoost | 0.788 (0.762, 0.815) | 0.823 | 0.836 | 0.971 | 0.898 | 0.149 |
|  |  | LightGBM | 0.780 (0.753, 0.807) | 0.814 | 0.838 | 0.954 | 0.892 | 0.131 |
|  |  | MLP | 0.742 (0.712, 0.772) | 0.831 | 0.790 | 0.951 | 0.901 | 0.169 |
| 5 | Train | LR | 0.781 (0.751, 0.812) | 0.815 | 0.835 | 0.961 | 0.893 | 0.130 |
|  |  | RF | 0.772 (0.742, 0.803) | 0.812 | 0.835 | 0.955 | 0.891 | 0.134 |
|  |  | XGBoost | 0.790 (0.761, 0.819) | 0.819 | 0.834 | 0.969 | 0.896 | 0.150 |
|  |  | LightGBM | 0.783 (0.754, 0.812) | 0.815 | 0.838 | 0.955 | 0.893 | 0.132 |
|  |  | MLP | 0.744 (0.728, 0.759) | 0.827 | 0.854 | 0.948 | 0.898 | 0.173 |
|  | Test | LR | 0.776 (0.747, 0.804) | 0.822 | 0.834 | 0.973 | 0.898 | 0.129 |
|  |  | RF | 0.782 (0.755, 0.808) | 0.813 | 0.836 | 0.954 | 0.892 | 0.130 |
|  |  | XGBoost | 0.786 (0.759, 0.812) | 0.820 | 0.831 | 0.976 | 0.897 | 0.149 |
|  |  | LightGBM | 0.779 (0.751, 0.806) | 0.817 | 0.835 | 0.964 | 0.895 | 0.131 |
|  |  | MLP | 0.724 (0.692, 0.756) | 0.823 | 0.854 | 0.941 | 0.895 | 0.177 |

Note: AUC: Area under the curve. LR: logistic regression. RF: Random Forest. XGBoost: Extreme Gradient Boosting. MLP: Multilayer Perceptron; *CI*: confidence interval.

**Supplemental Table 3.** Evaluation of the machine learning model performance in male.

| **Category** | **Algorithm** | **AUC (95%CI)** | **Accuracy** | **Precision** | **Recall** | **F1** | **Brier_Score** |
| --- | --- | --- | --- | --- | --- | --- | --- |
| Test | LR | 0.774 (0.756, 0.792) | 0.830 | 0.846 | 0.971 | 0.904 | 0.124 |
|  | RF | 0.978 (0.972, 0.984) | 0.964 | 0.965 | 0.992 | 0.978 | 0.040 |
|  | XGBoost | 0.839 (0.824, 0.854) | 0.847 | 0.854 | 0.982 | 0.914 | 0.137 |
|  | LightGBM | 0.791 (0.774, 0.809) | 0.823 | 0.823 | 1.000 | 0.903 | 0.146 |
|  | MLP | 0.735 (0.693, 0.777) | 0.822 | 0.852 | 0.973 | 0.899 | 0.179 |
| Train | LR | 0.769 (0.730, 0.809) | 0.828 | 0.845 | 0.970 | 0.903 | 0.125 |
|  | RF | 0.760 (0.720, 0.800) | 0.820 | 0.844 | 0.959 | 0.897 | 0.128 |
|  | XGBoost | 0.772 (0.733, 0.812) | 0.823 | 0.841 | 0.969 | 0.900 | 0.146 |
|  | LightGBM | 0.749 (0.709, 0.790) | 0.823 | 0.823 | 1.000 | 0.903 | 0.146 |
|  | MLP | 0.793 (0.774, 0.812) | 0.837 | 0.851 | 0.972 | 0.908 | 0.163 |

Note: AUC: Area under the curve. LR: logistic regression. RF: Random Forest. XGBoost: Extreme Gradient Boosting. MLP: Multilayer Perceptron; *CI*: confidence interval.

**Supplemental Table 4.** Evaluation of the machine learning model performance in female.

| **Category** | **Algorithm** | **AUC (95%*CI*)** | **Accuracy** | **Precision** | **Recall** | **F1** | **Brier Score** |
| --- | --- | --- | --- | --- | --- | --- | --- |
| Test | LR | 0.802 (0.786, 0.819) | 0.816 | 0.835 | 0.955 | 0.891 | 0.132 |
|  | RF | 0.982 (0.977, 0.987) | 0.962 | 0.964 | 0.989 | 0.976 | 0.042 |
|  | XGBoost | 0.862 (0.848, 0.875) | 0.839 | 0.848 | 0.969 | 0.904 | 0.142 |
|  | LightGBM | 0.821 (0.806, 0.837) | 0.787 | 0.787 | 1.000 | 0.881 | 0.167 |
|  | MLP | 0.777 (0.773, 0.820) | 0.836 | 0.865 | 0.937 | 0.900 | 0.164 |
| Train | LR | 0.797 (0.760, 0.834) | 0.815 | 0.834 | 0.954 | 0.890 | 0.133 |
|  | RF | 0.801 (0.765, 0.837) | 0.812 | 0.837 | 0.945 | 0.888 | 0.134 |
|  | XGBoost | 0.802 (0.766, 0.838) | 0.812 | 0.832 | 0.954 | 0.889 | 0.153 |
|  | LightGBM | 0.784 (0.746, 0.823) | 0.787 | 0.787 | 1.000 | 0.881 | 0.167 |
|  | MLP | 0.755 (0.734, 0.776) | 0.819 | 0.848 | 0.937 | 0.891 | 0.181 |

Notes: AUC: Area under the curve. LR: logistic regression. RF: Random Forest. XGBoost: Extreme Gradient Boosting. MLP: Multilayer Perceptron; *CI*: confidence interval.

**Supplemental Table 5**. Results of regression analysis of interaction terms between psychological resilience and self-esteem.

| **Variables** | **Estimate** | ***SE*** | ***t*** | ***P*** |
| --- | --- | --- | --- | --- |
| Intercept | 0.517 | 0.078 | 6.629 | <0.001 |
| Psychological resilience | -0.015 | 0.002 | -6.889 | <0.001 |
| Self-esteem | -0.016 | 0.002 | -8.399 | <0.001 |
| Psychological resilience * Self-esteem | <0.001 | <0.001 | 6.581 | <0.001 |

Notes: Controlling for additional variables such as grade, residence, maternal education level, family economic status, academic performance, sleep quality, negative life events, school connectedness, and parent-adolescent cohesion.


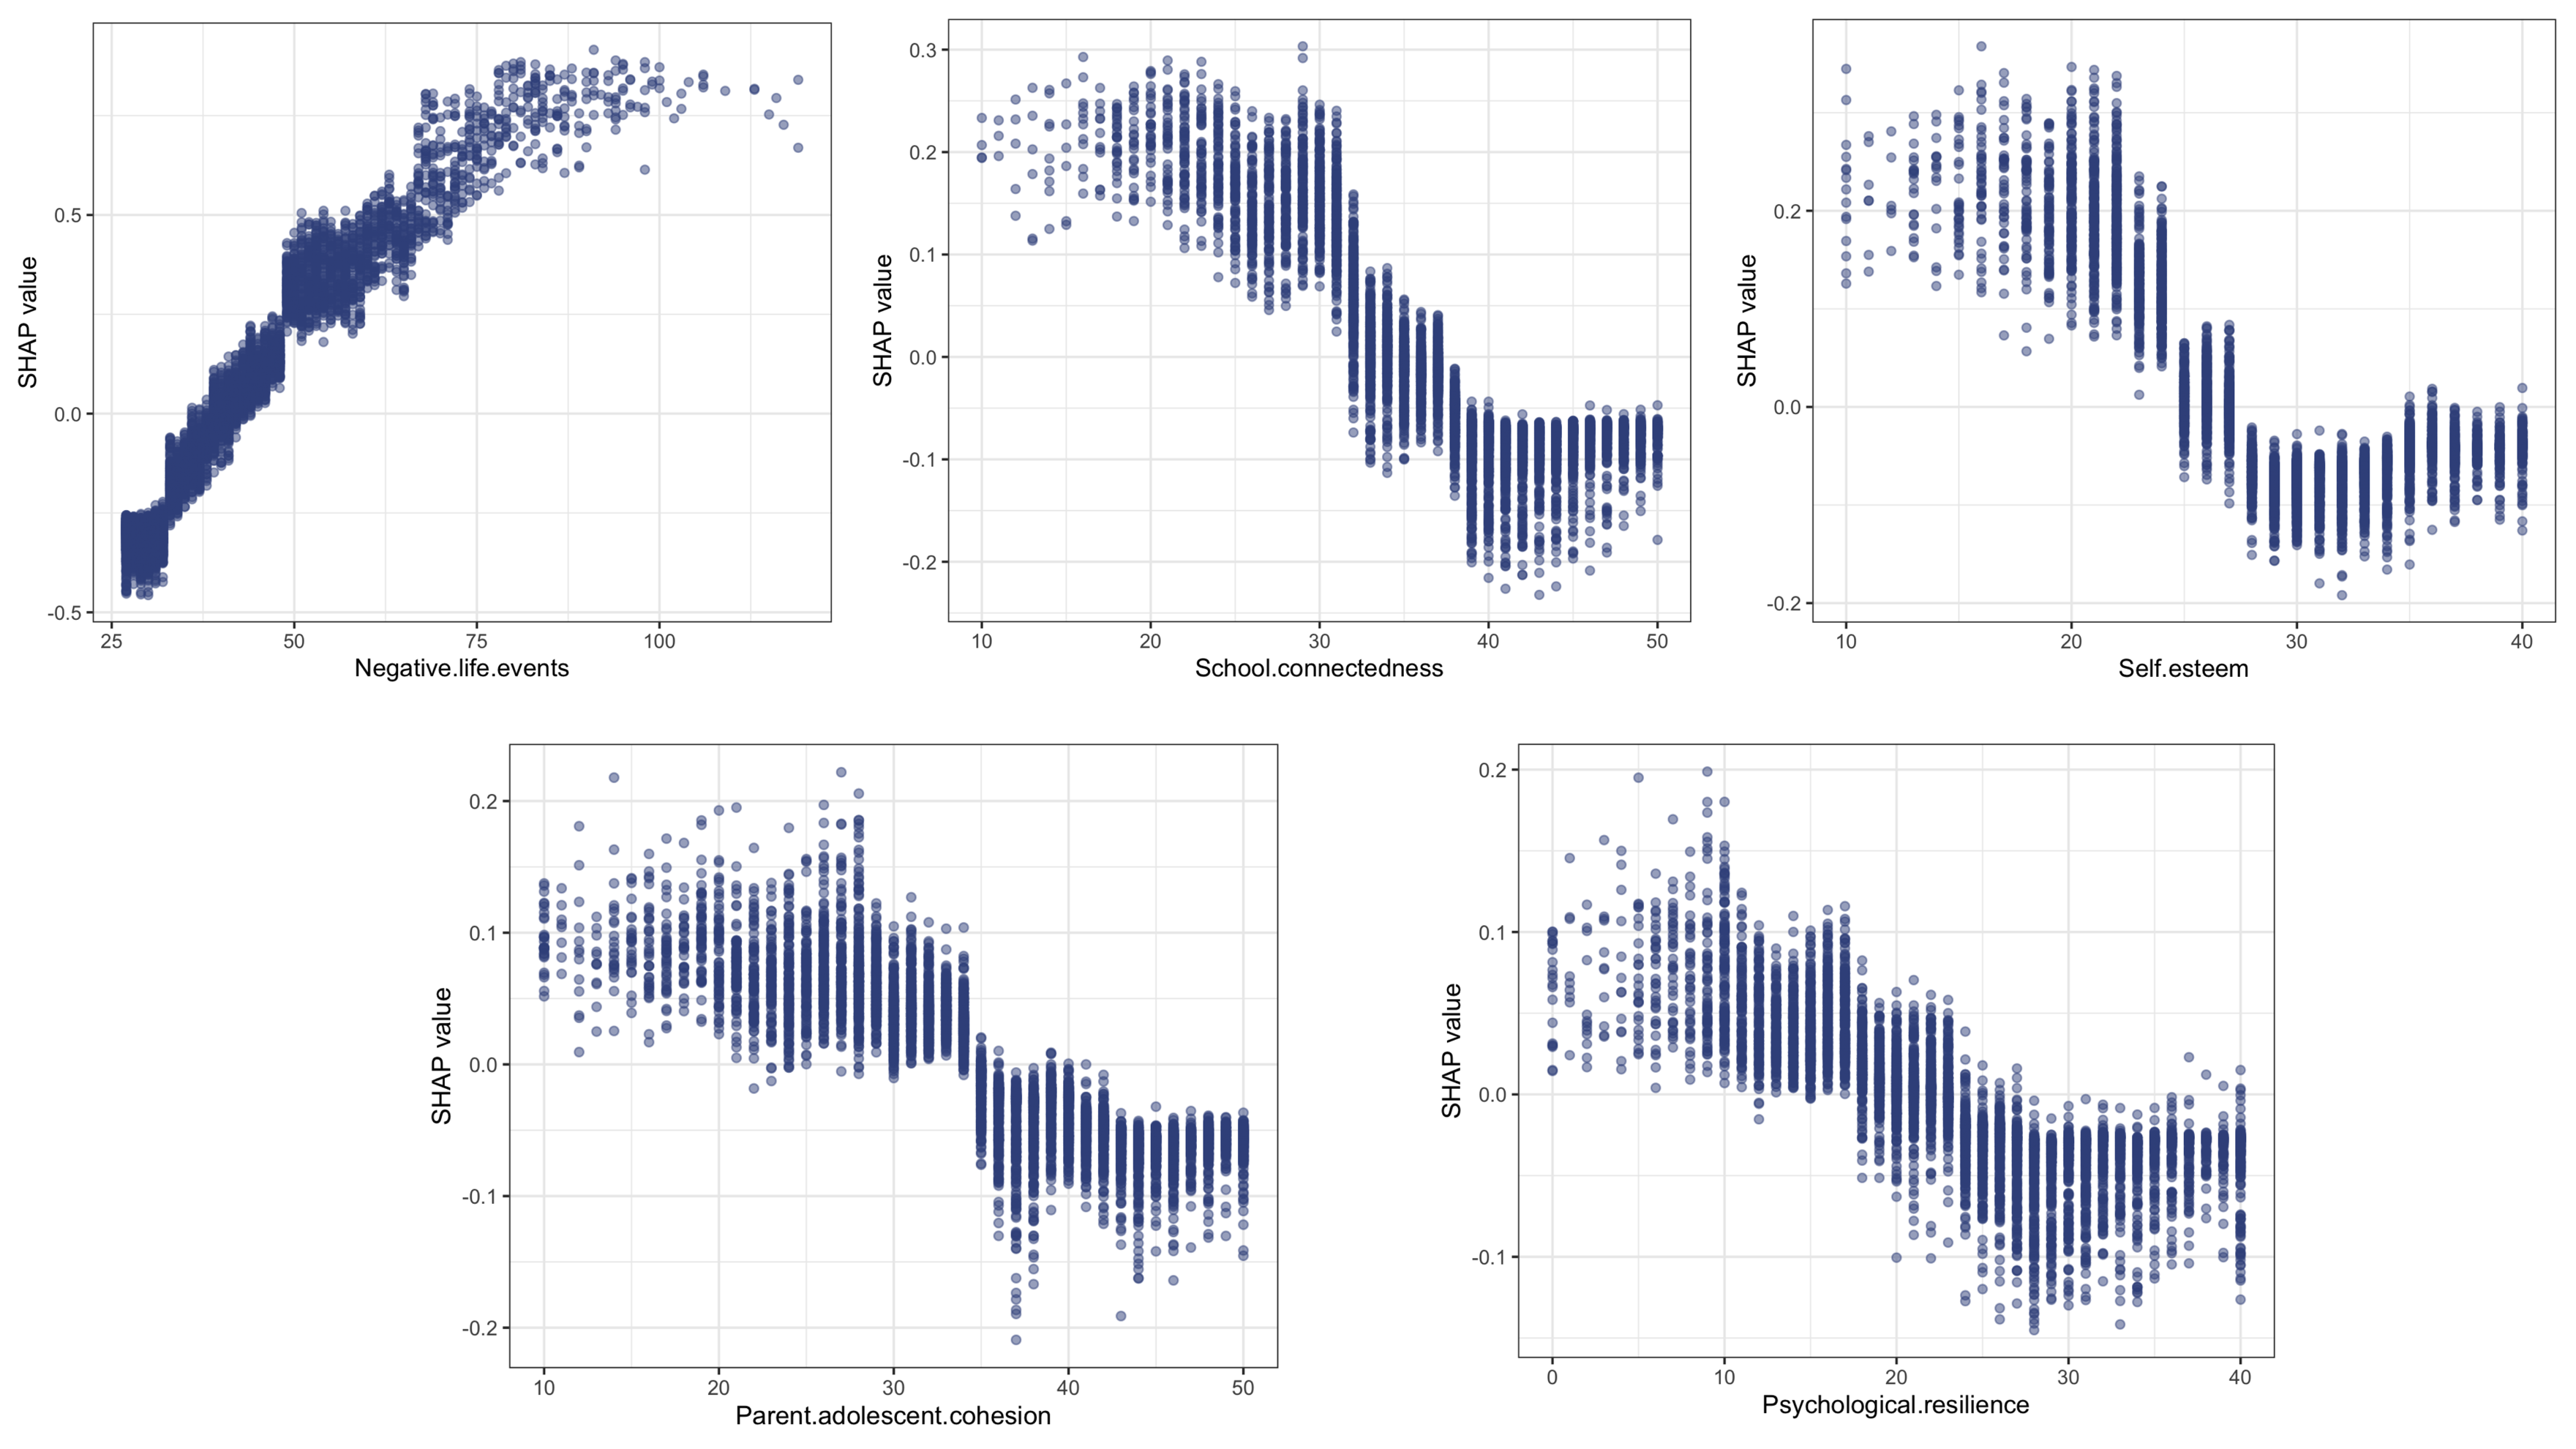
**Supplemental Figure 1.** SHAP feature dependence diagram.
